# Supplementary material for: An intramolecular-locked strategy for designing nonlinear optical materials with remarkable first hyperpolarizability
Source: Royal Society of Chemistry journal article supplement (doi:10.1039/d2cp02850f), 2022-01-01
Supplement: d2cp02850f2.pdf [file d2cp02850f2.pdf]

## Supporting Information

### Intramolecular-locked strategy for design nonlinear optics material with the remarkable first hyperpolarizability

Bo Li,<sup>a</sup> Tiejun Xiao,<sup>a</sup> Hujun Shen,<sup>a</sup> Mingsen Deng,<sup>\*a</sup> and Feng Long Gu<sup>\*b,c</sup>

<sup>a</sup>Guizhou Provincial Key Laboratory of Computational Nano-Material Science, Guizhou Education University, Guiyang 550018, P. R. China; E-mail: [deng@gznc.edu.cn](mailto:deng@gznc.edu.cn)

<sup>b</sup>MOE Key Laboratory of Environmental Theoretical Chemistry, South China Normal University, Guangzhou 510006, P. R. China; E-mail: [gu@scnu.edu.cn](mailto:gu@scnu.edu.cn)

<sup>c</sup>SCNU Environmental Research Institute, Guangdong Provincial Key Laboratory of Chemical Pollution and Environmental Safety, School of Environment, South China Normal University, Guangzhou 510006, P. R. China; E-mail: [gu@scnu.edu.cn](mailto:gu@scnu.edu.cn)

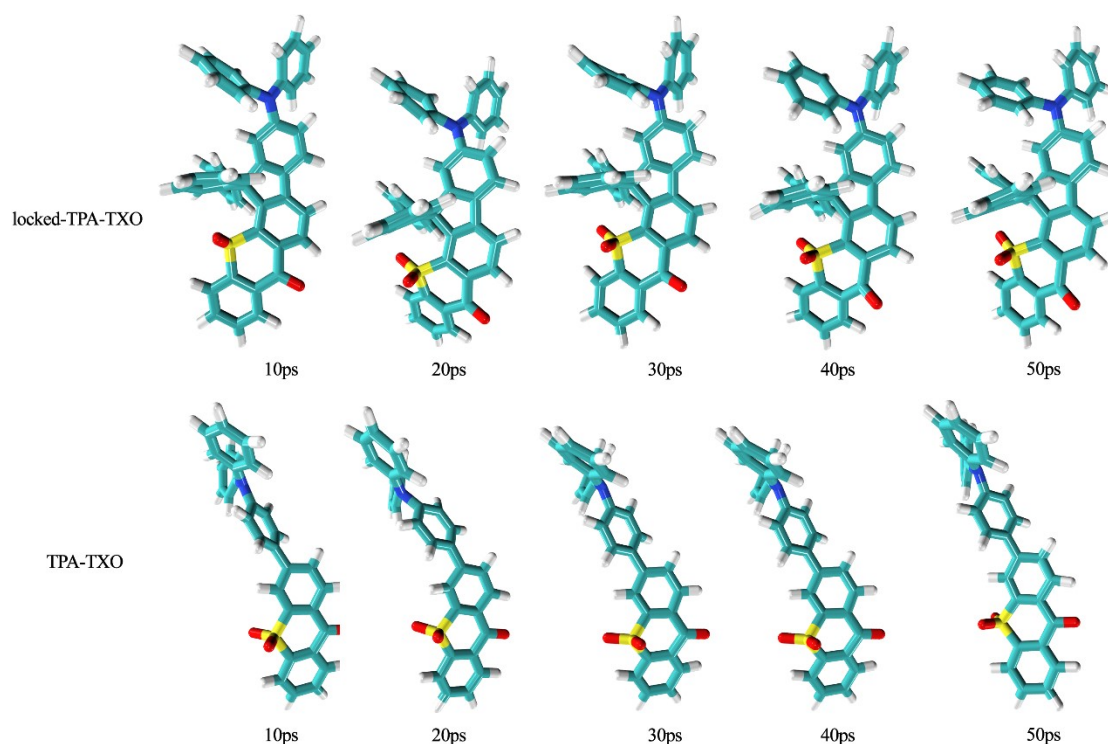

Fig. S1 The geometries TPA-TXO and locked-TPA-TXO of ab initio molecular dynamics stimulations for total time of 50 ps and temperature of 298.15 K.

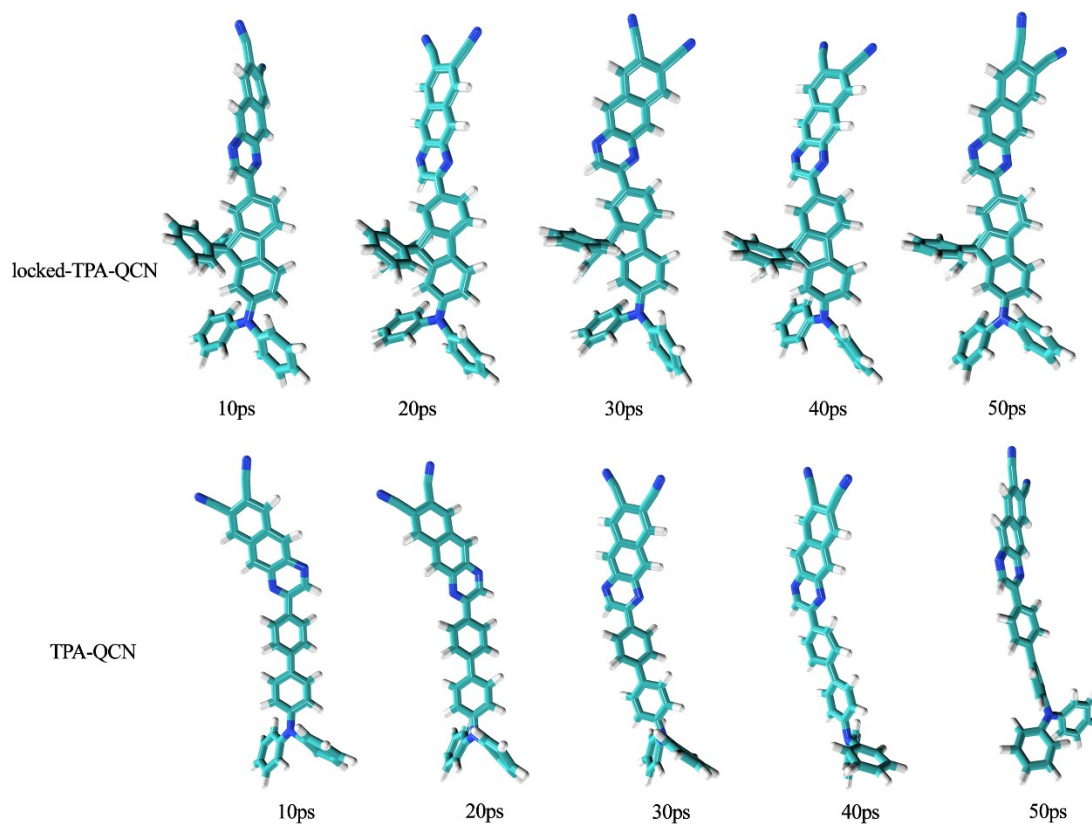

Fig. S2 The geometries TPA-QCN and locked-TPA-QCN of ab initio molecular dynamics stimulations for total time of 50 ps and temperature of 298.15 K.

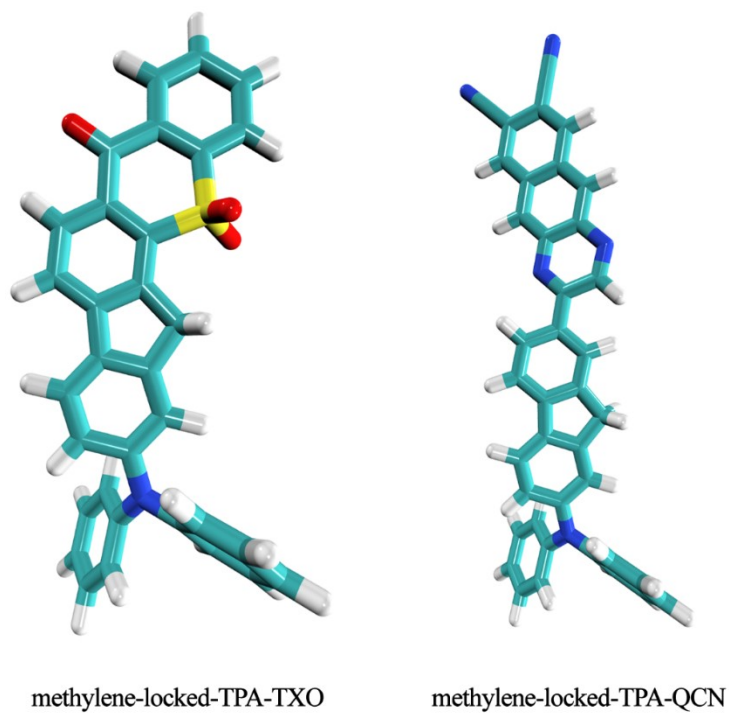

Fig. S3 The methylene linker locked structures of TPA-TXO and TPA-QCN at M06-2X-D3/def2-TZVP level.

The  $\omega$  values of  $\omega$ B97XD are 0.1323 Bohr<sup>-1</sup> and 0.1265 Bohr<sup>-1</sup> for methylene-locked-TPA-TXO and methylene-locked-TPA-QCN, respectively.
